# Supplementary material
Source: ML conference proceedings conference paper supplement (https://proceedings.neurips.cc/paper_files/paper/2014/hash/0966289037ad9846c5e994be2a91bafa-Abstract.html)
Supplement: Supplementary file [file 0966289037ad9846c5e994be2a91bafa-Supplemental.zip]

---

# Supplementary Material

## Global Sensitivity Analysis for MAP Inference in Graphical Models

---

**Jasper De Bock**  
Ghent University, SYSTeMS  
Ghent (Belgium)  
jasper.debock@ugent.be

**Cassio P. de Campos**  
Queen's University  
Belfast (UK)  
c.decampos@qub.ac.uk

**Alessandro Antonucci**  
IDSIA  
Lugano (Switzerland)  
alessandro@idsia.ch

### 1 Proof of Theorem 1

**Theorem 1.** *Let  $X$  be a variable taking values in a finite set  $\text{Val}(X)$  and let  $\mathcal{P}$  be a set of candidate mass functions over  $X$ . Let  $\tilde{x}$  be a MAP instantiation for a mass function  $P \in \mathcal{P}$ . Then  $\tilde{x}$  is the unique MAP instantiation for every  $P' \in \mathcal{P}$  (equivalently  $\text{Val}^*(X)$  has cardinality one) if and only if*

$$\min_{P' \in \mathcal{P}} P'(\tilde{x}) > 0 \text{ and } \max_{x \in \text{Val}(X) \setminus \{\tilde{x}\}} \max_{P' \in \mathcal{P}} \frac{P'(x)}{P'(\tilde{x})} < 1, \quad (1)$$

where the first inequality should be checked first because if it fails, then the left-hand side of the second inequality is ill-defined.

*Proof.* We start by noticing that  $\tilde{x}$  is the unique MAP instantiation for every  $P' \in \mathcal{P}$  if and only if

$$\forall P' \in \mathcal{P}, \forall x \in \text{Val}(X) \setminus \{\tilde{x}\} : P'(\tilde{x}) > P'(x). \quad (2)$$

In order for this condition to be satisfied, it is clearly necessary that  $P'(\tilde{x})$  be strictly positive for each  $P' \in \mathcal{P}$  or, equivalently, by the compactness of  $\mathcal{P}$ , that the leftmost part of Eq. (1) be satisfied. Under this condition, Eq. (2) can be rewritten as

$$\forall P' \in \mathcal{P}, \forall x \in \text{Val}(X) \setminus \{\tilde{x}\} : \frac{P'(x)}{P'(\tilde{x})} < 1 \Leftrightarrow \max_{x \in \text{Val}(X) \setminus \{\tilde{x}\}} \max_{P' \in \mathcal{P}} \frac{P'(x)}{P'(\tilde{x})} < 1, \quad (3)$$

where the compactness of  $\mathcal{P}$  implies the existence of the final maximum.  $\square$

### 2 Proof of Theorem 2

**Theorem 2.** *Let  $\mathbf{X} = (X_1, \dots, X_n)$  be a vector of variables taking values in their respective finite domains  $\text{Val}(X_1), \dots, \text{Val}(X_n)$ , let  $I_1, \dots, I_m$  be a collection of index sets such that  $I_1 \cup \dots \cup I_m = [n]$  and, for every  $k \in [m]$ , let  $\psi_k$  be a compact set of nonnegative factors over  $\mathbf{X}_{I_k}$  such that  $\Psi = \times_{k=1}^m \psi_k$  is a family of PGMs.*

*Consider now a PGM  $\Phi \in \Psi$  and a MAP instantiation  $\tilde{\mathbf{x}}$  for  $P_\Phi$  and define, for every  $k \in [m]$  and every  $\mathbf{x}_{I_k} \in \text{Val}(\mathbf{X}_{I_k})$ :*

$$\alpha_k := \min_{\phi_k \in \psi_k} \phi'_k(\tilde{\mathbf{x}}_k) \text{ and } \beta_k(\mathbf{x}_{I_k}) := \max_{\phi'_k \in \psi_k} \frac{\phi'_k(\mathbf{x}_{I_k})}{\phi'_k(\tilde{\mathbf{x}}_{I_k})}. \quad (4)$$

*Then  $\tilde{\mathbf{x}}$  is the unique MAP instantiation for every  $P' \in \mathcal{P}_\Psi$  if and only if*

$$(\forall k \in [m]) \alpha_k > 0 \text{ and } \prod_{k=1}^m \beta_k(\mathbf{x}_{I_k}^{(2)}) < 1, \quad (\text{RMAP})$$

where  $\mathbf{x}^{(2)}$  is an arbitrary second best MAP instantiation for the distribution  $P_{\tilde{\Phi}}$  that corresponds to the PGM  $\tilde{\Phi} := \{\beta_1, \dots, \beta_m\}$ . The first criterion in (RMAP) should be checked first because  $\beta_k(\mathbf{x}_{I_k}^{(2)})$  is ill-defined if  $\alpha_k = 0$ .

*Proof.* Since every set of factors  $\psi_k$  is compact,  $\mathcal{P}_\Psi$  is compact as well. Therefore, by Th. 1,  $\tilde{\mathbf{x}}$  is the unique MAP instantiation for every  $P' \in \mathcal{P}_\Psi$  if and only if

$$\min_{P' \in \mathcal{P}_\Psi} P'(\tilde{\mathbf{x}}) > 0 \text{ and } \max_{\mathbf{x} \in \text{Val}(\mathbf{X}) \setminus \{\tilde{\mathbf{x}}\}} \max_{P' \in \mathcal{P}_\Psi} \frac{P'(\mathbf{x})}{P'(\tilde{\mathbf{x}})} < 1. \quad (5)$$

Hence, we are left to prove that Eq. (5) is equivalent to (RMAP). By the compactness of  $\mathcal{P}_\Psi$ :

$$\begin{aligned} \min_{P' \in \mathcal{P}_\Psi} P'(\tilde{\mathbf{x}}) > 0 &\Leftrightarrow (\forall P' \in \mathcal{P}_\Psi) P'(\tilde{\mathbf{x}}) > 0 \Leftrightarrow (\forall \Phi' \in \Psi) P_{\Phi'}(\tilde{\mathbf{x}}) > 0 \\ &\Leftrightarrow (\forall \Phi' \in \Psi) \frac{1}{Z_{\Phi'}} \prod_{k=1}^m \phi'_k(\tilde{\mathbf{x}}_{I_k}) > 0 \Leftrightarrow (\forall \Phi' \in \Psi) \prod_{k=1}^m \phi'_k(\tilde{\mathbf{x}}_{I_k}) > 0 \\ &\Leftrightarrow (\forall \Phi' \in \Psi) (\forall k \in [m]) \phi'_k(\tilde{\mathbf{x}}_{I_k}) > 0 \Leftrightarrow (\forall k \in [m]) (\forall \phi'_k \in \psi_k) \phi'_k(\tilde{\mathbf{x}}_{I_k}) > 0. \end{aligned}$$

Thus, given the compactness of the sets  $\psi_k$ , the first inequality in Eq. (5) is equivalent to the first criterion in (RMAP).

If this first criterion holds, again using the compactness of the sets  $\psi_k$ , we find that all the  $\beta_k(\mathbf{x}_{I_k})$  are well-defined and nonnegative. Also, if the first criterion holds, then for all  $\mathbf{x} \in \text{Val}(\mathbf{X})$ :

$$f(\mathbf{x}) := \max_{P' \in \mathcal{P}_\Psi} \frac{P'(\mathbf{x})}{P'(\tilde{\mathbf{x}})} = \max_{\Phi' \in \Psi} \frac{P_{\Phi'}(\mathbf{x})}{P_{\Phi'}(\tilde{\mathbf{x}})} = \max_{\Phi' \in \Psi} \prod_{k=1}^m \frac{\phi'_k(\mathbf{x}_{I_k})}{\phi'_k(\tilde{\mathbf{x}}_{I_k})} = \prod_{k=1}^m \max_{\phi'_k \in \psi_k} \frac{\phi'_k(\mathbf{x}_{I_k})}{\phi'_k(\tilde{\mathbf{x}}_{I_k})} = \prod_{k=1}^m \beta_k(\mathbf{x}_{I_k}).$$

Thus, since  $f(\tilde{\mathbf{x}}) = 1$ ,  $\tilde{\Phi} = \{\beta_1, \dots, \beta_m\}$  is indeed a PGM. To conclude the proof, we show that the second inequality in Eq. (5), which can now be reformulated as

$$c := \max_{\mathbf{x} \in \text{Val}(\mathbf{X}) \setminus \{\tilde{\mathbf{x}}\}} f(\mathbf{x}) < 1,$$

is equivalent to  $f(\mathbf{x}^{(2)}) < 1$ . Let  $\mathbf{x}^{(1)}$  be (one of) the MAP instantiation(s) for  $P_{\tilde{\Phi}}$  that enable(s)  $\mathbf{x}^{(2)}$  to satisfy Eq. (5,main paper). First, assume that  $f(\mathbf{x}^{(2)}) < 1$ . Then by Eq. (5,main paper) and because  $f(\tilde{\mathbf{x}}) = 1$ , we see that  $\mathbf{x}^{(1)} = \tilde{\mathbf{x}}$  and therefore that  $c = f(\mathbf{x}^{(2)}) < 1$ . Next, assume that  $c < 1$ . Then by Eq. (5,main paper) and because  $f(\tilde{\mathbf{x}}) = 1$ , we find that  $\mathbf{x}^{(1)} = \tilde{\mathbf{x}}$  and  $f(\mathbf{x}^{(2)}) < 1$ .  $\square$
